# Supplementary material
Source: PubMed Central journal article supplement (PMC8316140)
Supplement: aac.00124-21-s0001.pdf [file aac.00124-21-s0001.pdf]

4 **Figure S2.** Multiple sequence alignment of wild type *bla*<sub>PDC-1</sub>, *bla*<sub>PDC-3</sub>, *bla*<sub>PDC-5</sub>, and the mutant *bla*<sub>PDC</sub> displaying the 7 amino acid  
 5 deletion flanked by direct repeats (represented by black arrows). The alignment was done using the Ugene software and visualized  
 6 with the Multalin website application.

7

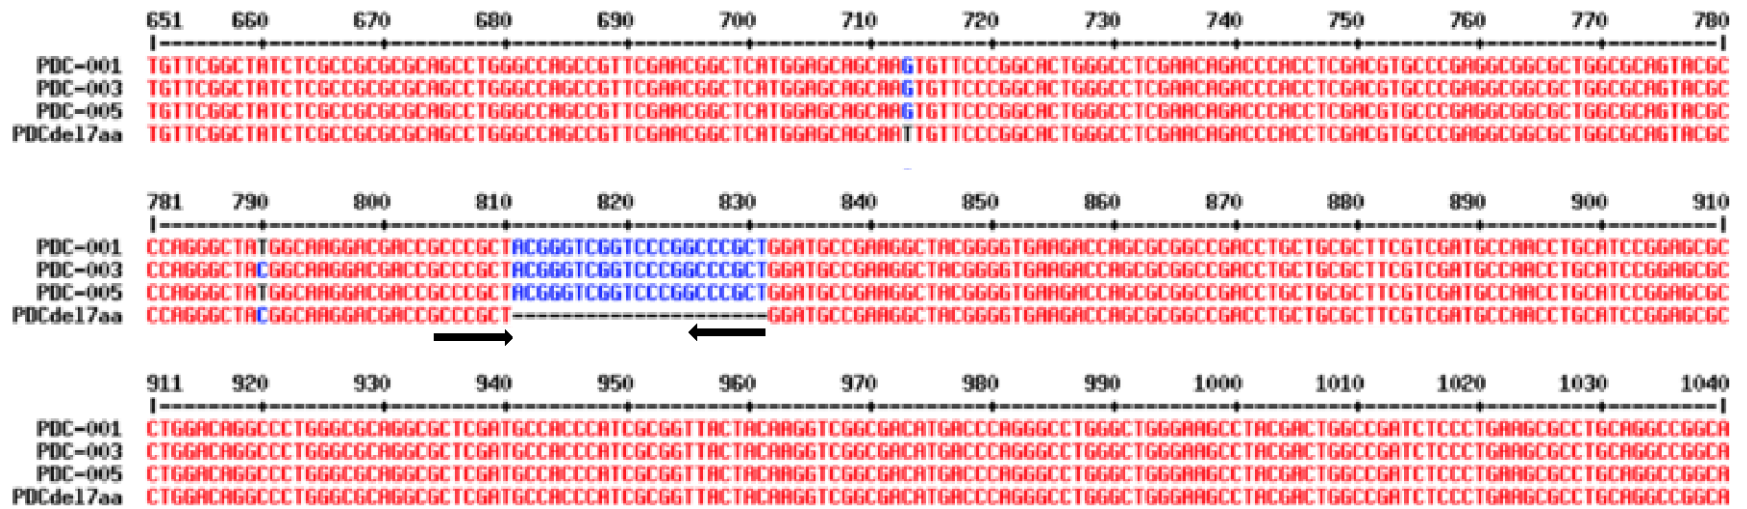

8

**Table S1.** Ceftazidime Hollow Fiber Infection Model Concentration determinations by experiment.

*Experiment #1*

Arm B:

| <b>Central Reservoir</b> |              |                            |
|--------------------------|--------------|----------------------------|
| Samples                  | Time (hours) | Conc. ( $\mu\text{g/mL}$ ) |
| ArmBS_0h                 | 0            | 4.76                       |
| ArmB_2h                  | 2            | 64.8                       |
| ArmB_4h                  | 4            | 6.290                      |
| ArmB_6h                  | 6            | 0.809                      |
| ArmB_8h                  | 8            | 0.09                       |
| ArmB_10h                 | 10           | 69.5                       |
| ArmB_24h                 | 24           | 0.19                       |
| ArmB_26h                 | 26           | 71.4                       |
| ArmB_28h                 | 28           | 10.2                       |
| ArmB_30h                 | 30           | 1.04                       |
| ArmB_32h                 | 32           | 0.159                      |
| ArmB_34h                 | 34           | 65.9                       |
| ArmB_48h                 | 48           | 0.48                       |

Arm C:

| <b>Central Reservoir</b> |              |                            |
|--------------------------|--------------|----------------------------|
| Samples                  | Time (hours) | Conc. ( $\mu\text{g/mL}$ ) |
| ArmC_2h                  | 2            | 58.6                       |
| ArmC_4h                  | 4            | 12.2                       |
| ArmC_6h                  | 6            | 2.86                       |
| ArmC_8h                  | 8            | 0.656                      |
| ArmC_10h                 | 10           | 54.2                       |
| ArmC_24h                 | 24           | 0.68                       |
| ArmC_26h                 | 26           | 47.90                      |
| ArmC_28h                 | 28           | 13.7                       |
| ArmC_30h                 | 30           | 2.88                       |

|          |    |       |
|----------|----|-------|
| ArmC_32h | 32 | 0.625 |
| ArmC_34h | 34 | 54.4  |
| ArmC_48h | 48 | 0.606 |

Arm D:

| <b>Central Reservoir</b> |              |                                   |
|--------------------------|--------------|-----------------------------------|
| Samples                  | Time (hours) | Conc. ( $\mu\text{g}/\text{mL}$ ) |
| ArmD_2h                  | 2            | 45.80                             |
| ArmD_4h                  | 4            | 13.80                             |
| ArmD_6h                  | 6            | 4.39                              |
| ArmD_8h                  | 8            | 1.30                              |
| ArmD_10h                 | 10           | 41.70                             |
| ArmD_24h                 | 24           | 0.930                             |
| ArmD_26h                 | 26           | 36.30                             |
| ArmD_28h                 | 28           | 13.60                             |
| ArmD_30h                 | 30           | 3.68                              |
| ArmD_32h                 | 32           | 1.21                              |
| ArmD_34h                 | 34           | 44.80                             |
| ArmD_48h                 | 48           | 1.16                              |

Arm E:

| <b>Central Reservoir</b> |              |                                   |
|--------------------------|--------------|-----------------------------------|
| Samples                  | Time (hours) | Conc. ( $\mu\text{g}/\text{mL}$ ) |
| ArmE_2h                  | 2            | 39.10                             |
| ArmE_4h                  | 4            | 15.20                             |
| ArmE_6h                  | 6            | 5.04                              |
| ArmE_8h                  | 8            | 2.00                              |
| ArmE_10h                 | 10           | 34.70                             |
| ArmE_24h                 | 24           | 1.71                              |
| ArmE_26h                 | 26           | 38.70                             |

|          |    |       |
|----------|----|-------|
| ArmE_28h | 28 | 14.40 |
| ArmE_30h | 30 | 5.27  |
| ArmE_32h | 32 | 2.09  |
| ArmE_34h | 34 | 35.30 |
| ArmE_48h | 48 | 2.02  |

Arm F:

| <b>Central Reservoir</b> |              |                            |
|--------------------------|--------------|----------------------------|
| Samples                  | Time (hours) | Conc. ( $\mu\text{g/mL}$ ) |
| ArmF_2h                  | 2            | 35.30                      |
| ArmF_4h                  | 4            | 18.60                      |
| ArmF_6h                  | 6            | 8.67                       |
| ArmF_8h                  | 8            | 4.52                       |
| ArmF_10h                 | 10           | 30.10                      |
| ArmF_24h                 | 24           | 3.18                       |
| ArmF_26h                 | 26           | 35.50                      |
| ArmF_28h                 | 28           | 17.60                      |
| ArmF_30h                 | 30           | 8.73                       |
| ArmF_32h                 | 32           | 4.53                       |
| ArmF_34h                 | 34           | 32.10                      |
| ArmF_48h                 | 48           | 4.41                       |

Arm G:

| <b>Central Reservoir</b> |              |                            |
|--------------------------|--------------|----------------------------|
| Samples                  | Time (hours) | Conc. ( $\mu\text{g/mL}$ ) |
| ArmG_2h                  | 2            | 4.10                       |
| ArmG_4h                  | 4            | 4.15                       |
| ArmG_6h                  | 6            | 3.97                       |
| ArmG_8h                  | 8            | 4.12                       |
| ArmG_10h                 | 10           | 3.87                       |
| ArmG_24h                 | 24           | 2.91                       |

|          |    |      |
|----------|----|------|
| ArmG_26h | 26 | 4.24 |
| ArmG_28h | 28 | 4.13 |
| ArmG_30h | 30 | 3.88 |
| ArmG_32h | 32 | 3.87 |
| ArmG_34h | 34 | 3.80 |
| ArmG_48h | 48 | 3.68 |

*Experiment #2*

Arm B:

| <b>Central Reservoir</b> |              |                                   |
|--------------------------|--------------|-----------------------------------|
| Samples                  | Time (hours) | Conc. ( $\mu\text{g}/\text{mL}$ ) |
| ArmBS_0h                 | 0            | No Peak                           |
| ArmB_2h                  | 2            | 60.0                              |
| ArmB_4h                  | 4            | 21.2                              |
| ArmB_6h                  | 6            | 9.41                              |
| ArmB_8h                  | 8            | 4.08                              |
| ArmB_10h                 | 10           | 56.5                              |
| ArmB_24h                 | 24           | 5.02                              |
| ArmB_26h                 | 26           | 54.7                              |
| ArmB_28h                 | 28           | 24.2                              |
| ArmB_30h                 | 30           | 8.06                              |
| ArmB_32h                 | 32           | 3.35                              |
| ArmB_34h                 | 34           | 47.8                              |
| ArmB_48h                 | 48           | 4.9                               |

Arm C:

| <b>Central Reservoir</b> |              |                                   |
|--------------------------|--------------|-----------------------------------|
| Samples                  | Time (hours) | Conc. ( $\mu\text{g}/\text{mL}$ ) |
| ArmC_2h                  | 2            | 59.0                              |
| ArmC_4h                  | 4            | 26.0                              |

|          |    |      |
|----------|----|------|
| ArmC_6h  | 6  | 12.0 |
| ArmC_8h  | 8  | 5.31 |
| ArmC_10h | 10 | 53.1 |
| ArmC_24h | 24 | 4.92 |
| ArmC_26h | 26 | 37.1 |
| ArmC_28h | 28 | 25.8 |
| ArmC_30h | 30 | 10.2 |
| ArmC_32h | 32 | 5.17 |
| ArmC_34h | 34 | 49.5 |
| ArmC_48h | 48 | 2.52 |

Arm D:

| <b>Central Reservoir</b> |              |               |
|--------------------------|--------------|---------------|
| Samples                  | Time (hours) | Conc. (µg/mL) |
| ArmD_2h                  | 2            | 49.7          |
| ArmD_4h                  | 4            | 22.3          |
| ArmD_6h                  | 6            | 11.7          |
| ArmD_8h                  | 8            | 4.77          |
| ArmD_10h                 | 10           | 46.2          |
| ArmD_24h                 | 24           | 3.87          |
| ArmD_26h                 | 26           | 34.8          |
| ArmD_28h                 | 28           | 22.4          |
| ArmD_30h                 | 30           | 10.1          |
| ArmD_32h                 | 32           | 4.38          |
| ArmD_34h                 | 34           | 46.7          |
| ArmD_48h                 | 48           | 3.01          |

Arm E:

| <b>Central Reservoir</b> |              |               |
|--------------------------|--------------|---------------|
| Samples                  | Time (hours) | Conc. (µg/mL) |
| ArmE_2h                  | 2            | 54.9          |

|          |    |      |
|----------|----|------|
| ArmE_4h  | 4  | 22.2 |
| ArmE_6h  | 6  | 8.52 |
| ArmE_8h  | 8  | 4.41 |
| ArmE_10h | 10 | 41.4 |
| ArmE_24h | 24 | 3.05 |
| ArmE_26h | 26 | 45.6 |
| ArmE_28h | 28 | 21.4 |
| ArmE_30h | 30 | 9.29 |
| ArmE_32h | 32 | 3.59 |
| ArmE_34h | 34 | 44.7 |
| ArmE_48h | 48 | 3.5  |

Arm F:

| <b>Central Reservoir</b> |              |                            |
|--------------------------|--------------|----------------------------|
| Samples                  | Time (hours) | Conc. ( $\mu\text{g/mL}$ ) |
| ArmF_2h                  | 2            | 54.6                       |
| ArmF_4h                  | 4            | 27.9                       |
| ArmF_6h                  | 6            | 12.4                       |
| ArmF_8h                  | 8            | 6.35                       |
| ArmF_10h                 | 10           | 47.0                       |
| ArmF_24h                 | 24           | 4.13                       |
| ArmF_26h                 | 26           | 51.7                       |
| ArmF_28h                 | 28           | 24.8                       |
| ArmF_30h                 | 30           | 12.4                       |
| ArmF_32h                 | 32           | 6.11                       |
| ArmF_34h                 | 34           | 45.8                       |
| ArmF_48h                 | 48           | 6.19                       |



Arm G:

| <b>Central Reservoir</b> |              |                            |
|--------------------------|--------------|----------------------------|
| Samples                  | Time (hours) | Conc. ( $\mu\text{g/mL}$ ) |
| ArmG_2h                  | 2            | 50.3                       |
| ArmG_4h                  | 4            | 25.5                       |
| ArmG_6h                  | 6            | 11.6                       |
| ArmG_8h                  | 8            | 6.56                       |
| ArmG_10h                 | 10           | 40.9                       |
| ArmG_24h                 | 24           | 4.23                       |
| ArmG_26h                 | 26           | 43.9                       |
| ArmG_28h                 | 28           | 23                         |
| ArmG_30h                 | 30           | 10.3                       |
| ArmG_32h                 | 32           | 5.41                       |
| ArmG_34h                 | 34           | 42.8                       |
| ArmG_48h                 | 48           | 5.01                       |

*Experiment #3*

Arm B:

| <b>Central Reservoir</b> |              |                            |
|--------------------------|--------------|----------------------------|
| Samples                  | Time (hours) | Conc. ( $\mu\text{g/mL}$ ) |
| ArmB_2h                  | 2            | 52.9                       |
| ArmB_4h                  | 4            | 28.9                       |
| ArmB_6h                  | 6            | 13.8                       |
| ArmB_8h                  | 8            | 6.64                       |
| ArmB_10h                 | 10           | 49.1                       |
| ArmB_24h                 | 24           | 5.95                       |
| ArmB_26h                 | 26           | 46.8                       |
| ArmB_28h                 | 28           | 25.2                       |
| ArmB_30h                 | 30           | 12.8                       |
| ArmB_32h                 | 32           | 6.23                       |
| ArmB_34h                 | 34           | 47.3                       |
| ArmB_48h                 | 48           | 7.21                       |

Arm C:

| <b>Central Reservoir</b> |              |                            |
|--------------------------|--------------|----------------------------|
| Samples                  | Time (hours) | Conc. ( $\mu\text{g/mL}$ ) |
| ArmB_2h                  | 2            | 55.7                       |
| ArmB_4h                  | 4            | 32.6                       |
| ArmB_6h                  | 6            | 19.1                       |
| ArmB_8h                  | 8            | 9.28                       |
| ArmB_10h                 | 10           | 51.8                       |
| ArmB_24h                 | 24           | 8.64                       |
| ArmB_26h                 | 26           | 52.0                       |
| ArmB_28h                 | 28           | 28.2                       |
| ArmB_30h                 | 30           | 13.7                       |
| ArmB_32h                 | 32           | 8.32                       |
| ArmB_34h                 | 34           | 49.0                       |
| ArmB_48h                 | 48           | 8.13                       |

Arm D:

| <b>Central Reservoir</b> |              |                            |
|--------------------------|--------------|----------------------------|
| Samples                  | Time (hours) | Conc. ( $\mu\text{g/mL}$ ) |
| ArmB_2h                  | 2            | 52.2                       |
| ArmB_4h                  | 4            | 31.0                       |

|          |    |      |
|----------|----|------|
| ArmB_6h  | 6  | 15.1 |
| ArmB_8h  | 8  | 8.28 |
| ArmB_10h | 10 | 52.2 |
| ArmB_24h | 24 | 7.31 |
| ArmB_26h | 26 | 46.9 |
| ArmB_28h | 28 | 25.6 |
| ArmB_30h | 30 | 14.0 |
| ArmB_32h | 32 | 7.13 |
| ArmB_34h | 34 | 46.8 |
| ArmB_48h | 48 | 7.21 |

Arm E:

| <b>Central Reservoir</b> |              |                            |
|--------------------------|--------------|----------------------------|
| Samples                  | Time (hours) | Conc. ( $\mu\text{g/mL}$ ) |
| ArmB_2h                  | 2            | 49.8                       |
| ArmB_4h                  | 4            | 25.2                       |
| ArmB_6h                  | 6            | 13.1                       |
| ArmB_8h                  | 8            | 6.78                       |
| ArmB_10h                 | 10           | 46.3                       |
| ArmB_24h                 | 24           | 5.80                       |
| ArmB_26h                 | 26           | 48.3                       |
| ArmB_28h                 | 28           | 22.5                       |

|          |    |      |
|----------|----|------|
| ArmB_30h | 30 | 11.1 |
| ArmB_32h | 32 | 5.91 |
| ArmB_34h | 34 | 43.7 |
| ArmB_48h | 48 | 5.83 |

Arm F:

| <b>Central Reservoir</b> |                 |                               |
|--------------------------|-----------------|-------------------------------|
| Samples                  | Time<br>(hours) | Conc.<br>( $\mu\text{g/mL}$ ) |
| ArmB_2h                  | 2               | 50.0                          |
| ArmB_4h                  | 4               | 28.4                          |
| ArmB_6h                  | 6               | 14.0                          |
| ArmB_8h                  | 8               | 7.36                          |
| ArmB_10h                 | 10              | 51.4                          |
| ArmB_24h                 | 24              | 5.60                          |
| ArmB_26h                 | 26              | 50.0                          |
| ArmB_28h                 | 28              | 21.4                          |
| ArmB_30h                 | 30              | 10.8                          |
| ArmB_32h                 | 32              | 6.28                          |
| ArmB_34h                 | 34              | 49.1                          |
| ArmB_48h                 | 48              | 5.81                          |

*Experiment #4*

Arm B:

| <b>Central Reservoir</b> |              |                            |
|--------------------------|--------------|----------------------------|
| Samples                  | Time (hours) | Conc. ( $\mu\text{g/mL}$ ) |
| ArmB_0h                  | 0            | No Peak                    |
| ArmB_2h                  | 2            | 73.3                       |
| ArmB_4h                  | 4            | 37.6                       |
| ArmB_6h                  | 6            | 19.8                       |
| ArmB_8h                  | 8            | 10.1                       |
| ArmB_10h                 | 10           | 78.9                       |
| ArmB_24h                 | 24           | 8.2                        |
| ArmB_26h                 | 26           | 71.4                       |
| ArmB_28h                 | 28           | 33.3                       |
| ArmB_30h                 | 30           | 16                         |
| ArmB_32h                 | 32           | 7.86                       |
| ArmB_34h                 | 34           | 75.5                       |
| ArmB_48h                 | 48           | 6.91                       |

Arm C:

| <b>Central Reservoir</b> |              |                            |
|--------------------------|--------------|----------------------------|
| Samples                  | Time (hours) | Conc. ( $\mu\text{g/mL}$ ) |
| ArmC_0h                  | 0            | No Peak                    |

|          |    |      |
|----------|----|------|
| ArmC_2h  | 2  | 66.5 |
| ArmC_4h  | 4  | 35.5 |
| ArmC_6h  | 6  | 15.9 |
| ArmC_8h  | 8  | 7.59 |
| ArmC_10h | 10 | 67.4 |
| ArmC_24h | 24 | 8.15 |
| ArmC_26h | 26 | 73.4 |
| ArmC_28h | 28 | 33.8 |
| ArmC_30h | 30 | 15.1 |
| ArmC_32h | 32 | 8.81 |
| ArmC_34h | 34 | 69.5 |
| ArmC_48h | 48 | 8.04 |

Arm D:

| <b>Central Reservoir</b> |              |                            |
|--------------------------|--------------|----------------------------|
| Samples                  | Time (hours) | Conc. ( $\mu\text{g/mL}$ ) |
| ArmD_2h                  | 2            | 74.6                       |
| ArmD_4h                  | 4            | 36.8                       |
| ArmD_6h                  | 6            | 19.6                       |
| ArmD_8h                  | 8            | 9.49                       |
| ArmD_10h                 | 10           | 75.7                       |
| ArmD_24h                 | 24           | 6.12                       |
| ArmD_26h                 | 26           | 67.1                       |
| ArmD_28h                 | 28           | 33.2                       |
| ArmD_30h                 | 30           | 14                         |
| ArmD_32h                 | 32           | 6.36                       |
| ArmD_34h                 | 34           | 63.3                       |
| ArmD_48h                 | 48           | 5.87                       |

Arm E:

| <b>Central Reservoir</b> |
|--------------------------|
|--------------------------|

| Samples  | Time (hours) | Conc. ( $\mu\text{g}/\text{mL}$ ) |
|----------|--------------|-----------------------------------|
| ArmE_2h  | 2            | 68.9                              |
| ArmE_4h  | 4            | 34.1                              |
| ArmE_6h  | 6            | 16.8                              |
| ArmE_8h  | 8            | 8.02                              |
| ArmE_10h | 10           | 72.4                              |
| ArmE_24h | 24           | 6.66                              |
| ArmE_26h | 26           | 73.4                              |
| ArmE_28h | 28           | 33                                |
| ArmE_30h | 30           | 13.8                              |
| ArmE_32h | 32           | 6.63                              |
| ArmE_34h | 34           | 75.9                              |
| ArmE_48h | 48           | 6.19                              |

Arm F:

| <b>Central Reservoir</b> |              |                                   |
|--------------------------|--------------|-----------------------------------|
| Samples                  | Time (hours) | Conc. ( $\mu\text{g}/\text{mL}$ ) |
| ArmF_0h                  | 0            | No Peak                           |
| ArmF_2h                  | 2            | 49.7                              |
| ArmF_4h                  | 4            | 30.4                              |
| ArmF_6h                  | 6            | 16.8                              |
| ArmF_8h                  | 8            | 9.99                              |
| ArmF_10h                 | 10           | 81.7                              |
| ArmF_24h                 | 24           | 13.7                              |
| ArmF_26h                 | 26           | 74.8                              |
| ArmF_28h                 | 28           | 45.1                              |
| ArmF_30h                 | 30           | 24.1                              |
| ArmF_32h                 | 32           | 12.8                              |
| ArmF_34h                 | 34           | 79.8                              |
| ArmF_48h                 | 48           | 13.5                              |
